# Supplementary material for: Zn(ii)-based metal–organic frameworks with tailored architectures: optimizing fluorescence performance for cell imaging and cancer therapy
Source: Royal Society of Chemistry journal article supplement (doi:10.1039/d6ra02099b), 2026-05-15
Supplement: d6ra02099b1.pdf [file d6ra02099b1.pdf]

## Supporting Information

### **Zn(II)-Based Metal-Organic Frameworks with Tailored Architectures: Optimizing Fluorescence Performance for Cell Imaging and Cancer Therapy**

Jinglu Wang,<sup>a#</sup> Yutong Chen,<sup>b#</sup> Danian Tian,<sup>\*a</sup> Siyi Li,<sup>b</sup> Peipei Cen,<sup>\*a</sup> and Xiangyu Liu<sup>b</sup>

<sup>a</sup> *College of Public Health, Key Laboratory of Environmental Factors and Chronic Disease Control, Ningxia Medical University, Yinchuan 750004, China.*

<sup>b</sup> *State Key Laboratory of High-efficiency Utilization of Coal and Green Chemical Engineering, College of Chemistry and Chemical Engineering, Ningxia University, Yinchuan 750021, China.*

<sup>#</sup>These authors contributed equally to this work.

**\*Corresponding author**

**Dr. Peipei Cen**

**E-mail: 13895400691@163.com**

**\*Corresponding author**

**Dr. Danian Tian**

**E-mail: tiandanian@163.com**

## Contents

**Table S1.** Crystallographic data and refinement parameters for compound **1** and **2**.

**Table S2.** Selected bond lengths (Å) and bond angles (°) for compound **1**.

**Table S3.** Selected bond lengths (Å) and bond angles (°) for compound **2**.

**Figure S1** (a) Coordination environment and geometric configuration of Zn(II) in **1**; (b) The 1D chains of **1**; (c) The 2D layer of **1**; (d) The supramolecular 3D structure of **1**; (e) The  $\pi$ - $\pi$  Packing diagram of **1** (the dashed line represents the interaction). All hydrogen atoms for **1** are omitted for clarity.

**Figure S2** (a) FTIR for DHTA and bix organic ligands; (b) FTIR for **1** and **2** compounds.

**Figure S3** PXRD curves of **1** (a) and **2** (b).

**Figure S4** TGA curves of **1** and **2**.

**Figure S5** The pH stability of **1** (a) and **2** (b).

**Figure S6** Solid-state Fluorescence excitation and emission spectra of ligands DHTA (a), bix (b), **1** (c) and **2** (d). (Temperature = 23 °C,  $E_{x\text{DHTA}}$  = 425 nm,  $E_{x\text{bix}}$  = 440 nm,  $E_{x1}$  = 394 nm,  $E_{x2}$  = 402 nm.)

**Figure S7** Liquid fluorescence pattern of **1** (a) and **2** (b). (The solvent is ultrapure water, pH = 7.0, temperature = 23 °C,  $E_{x1}$  = 365 nm,  $E_{x2}$  = 370 nm)

**Figure S8** The luminescence decay curves of **1** (a) and **2** (b).

**Figure S9** Fluorescence intensity of **1** (a) and **2** (b) upon addition of different metal cations (20  $\mu$ L) in aqueous solutions. (The solvent is ultrapure water, pH = 7.0, temperature = 23 °C,  $E_{x1}$  = 365 nm,  $E_{x2}$  = 370 nm)

**Figure S10** Fluorescence intensity of **1** (a) and **2** (b) with the addition of different anions (20  $\mu$ L) in aqueous solutions. (The solvent is ultrapure water, pH = 7.0, temperature = 23°C,  $E_{x1}$  = 365 nm,  $E_{x2}$  = 370 nm)

**Figure S11** (a) and (b) belong to the transmission electron microscopy image of compound **1** in HeLa cells. Nucleus (N), mitochondria (Mi), rough endoplasmic reticulum (RER), lipid droplets (LD); nuclear shrinkage and widening of perinuclear space ( $\uparrow$ ), chromatin agglutination ( $\square$ ), mitochondrial shrinkage ( $\uparrow$ ), rough endoplasmic reticulum expansion ( $\uparrow$ ), apoptotic bodies ( $\uparrow$ ), vacuoles ( $\uparrow$ ), autophagy ( $\uparrow$ ).

**Figure S12** Energy level diagram of DHTA (a) and bix (b).

**Table S1.** Crystallographic data and refinement parameters for compound **1** and **2**.

|                                         | Compound <b>1</b>                                                | Compound <b>2</b>                                                |
|-----------------------------------------|------------------------------------------------------------------|------------------------------------------------------------------|
| Empirical formula                       | C <sub>22</sub> H <sub>18</sub> N <sub>4</sub> O <sub>6</sub> Zn | C <sub>22</sub> H <sub>18</sub> N <sub>4</sub> O <sub>6</sub> Zn |
| Formula weight                          | 499.77                                                           | 499.79                                                           |
| Crystal system                          | triclinic                                                        | monoclinic                                                       |
| Space group                             | $P\bar{1}$                                                       | $C2/c$                                                           |
| $a(\text{\AA})$                         | 8.2605(6)                                                        | 25.9395 (4)                                                      |
| $b(\text{\AA})$                         | 10.6797(8)                                                       | 10.8613(2)                                                       |
| $c(\text{\AA})$                         | 13.5264(10)                                                      | 18.3000(3)                                                       |
| $\alpha(^{\circ})$                      | 106.147(2)                                                       | 90                                                               |
| $\beta(^{\circ})$                       | 93.965(2)                                                        | 121.9110(10)                                                     |
| $\gamma(^{\circ})$                      | 102.238(2)                                                       | 90                                                               |
| $V(\text{\AA}^3)$                       | 1109.69(14)                                                      | 4376.59(13)                                                      |
| $\mu$ (mm <sup>-1</sup> )               | 1.153                                                            | 1.169                                                            |
| Unique reflections                      | 3894                                                             | 4482                                                             |
| Observed reflections                    | 25905                                                            | 22463                                                            |
| $R_{int}$                               | 0.0513                                                           | 0.0361                                                           |
| Final $R$ indices [ $I > 2 \sigma(I)$ ] | $R_1 = 0.0546$<br>$wR_2 = 0.1368$                                | $R_1 = 0.0350$<br>$wR_2 = 0.0867$                                |
| $R$ indices (all data)                  | $R_1 = 0.0738$<br>$wR_2 = 0.1483$                                | $R_1 = 0.0448$<br>$wR_2 = 0.0927$                                |

**Table S2.** Selected bond lengths (Å) and bond angles (°) for compound **1**.

| Compound <b>1</b>             |            |                                |            |
|-------------------------------|------------|--------------------------------|------------|
| Zn(1)-O(4)                    | 1.935(3)   | O(2)-Zn(1)-N(4 <sup>1</sup> )  | 118.20(16) |
| Zn(1)-O(2)                    | 1.979(3)   | N(4 <sup>1</sup> )-Zn(1)-N(1)  | 111.36(16) |
| Zn(1)-N(4 <sup>1</sup> )      | 1.995(4)   | C(1)-O(4)-Zn(1)                | 117.6(3)   |
| Zn(1)-N(1)                    | 2.004(4)   | C(5)-O(2)-Zn(1)                | 116.7(3)   |
| O(4)-Zn(1)-O(2)               | 96.49(14)  | C(21)-N(4)-Zn(1 <sup>1</sup> ) | 124.4(3)   |
| O(4)-Zn(1)-N(4 <sup>1</sup> ) | 119.39(16) | C(22)-N(4)-Zn(1 <sup>1</sup> ) | 127.7(3)   |
| O(4)-Zn(1)-N(1)               | 110.52(16) | C(11)-N(1)-Zn(1)               | 124.6(3)   |
| O(2)-Zn(1)-N(4 <sup>1</sup> ) | 100.15(15) | C(9)-N(1)-Zn(1)                | 129.7(4)   |

<sup>1</sup>1-X, 1-Y, 2-Z; <sup>2</sup>2-X, 2-Y, 1-Z; <sup>3</sup>2-X, 1-Y, 2-Z

**Table S3.** Selected bond lengths (Å) and bond angles (°) for compound **2**.

| Compound <b>2</b>             |            |                                |            |
|-------------------------------|------------|--------------------------------|------------|
| Zn(1)-O(2)                    | 1.9531(17) | O(4)-Zn(1)-N(1)                | 103.66(9)  |
| Zn(1)-O(4)                    | 1.9494(17) | N(1)-Zn(1)-N(4 <sup>1</sup> )  | 108.66(9)  |
| Zn(1)-N(4 <sup>1</sup> )      | 2.005(2)   | C(5)-O(2)-Zn(1)                | 114.84(16) |
| Zn(1)-N(1)                    | 1.985(2)   | C(1)-O(4)-Zn(1)                | 117.99(17) |
| O(2)-Zn(1)-N(4 <sup>1</sup> ) | 102.31(8)  | C(20)-N(4)-Zn(1 <sup>2</sup> ) | 118.60(19) |
| O(2)-Zn(1)-N(1)               | 118.22(8)  | C(21)-N(4)-Zn(1 <sup>2</sup> ) | 132.8(2)   |
| O(4)-Zn(1)-O(2)               | 113.50(8)  | C(10)-N(1)-Zn(1)               | 127.18(18) |
| O(4)-Zn(1)-N(4 <sup>1</sup> ) | 110.47(8)  | C(9)-N(1)-Zn(1)                | 126.5(2)   |

<sup>1</sup>-1/2+X, -1/2+Y, +Z; <sup>2</sup>1/2+X, 1/2+Y, +Z; <sup>3</sup>1-X, -Y, 1-Z; <sup>4</sup>1/2-X, -1/2-Y, -Z

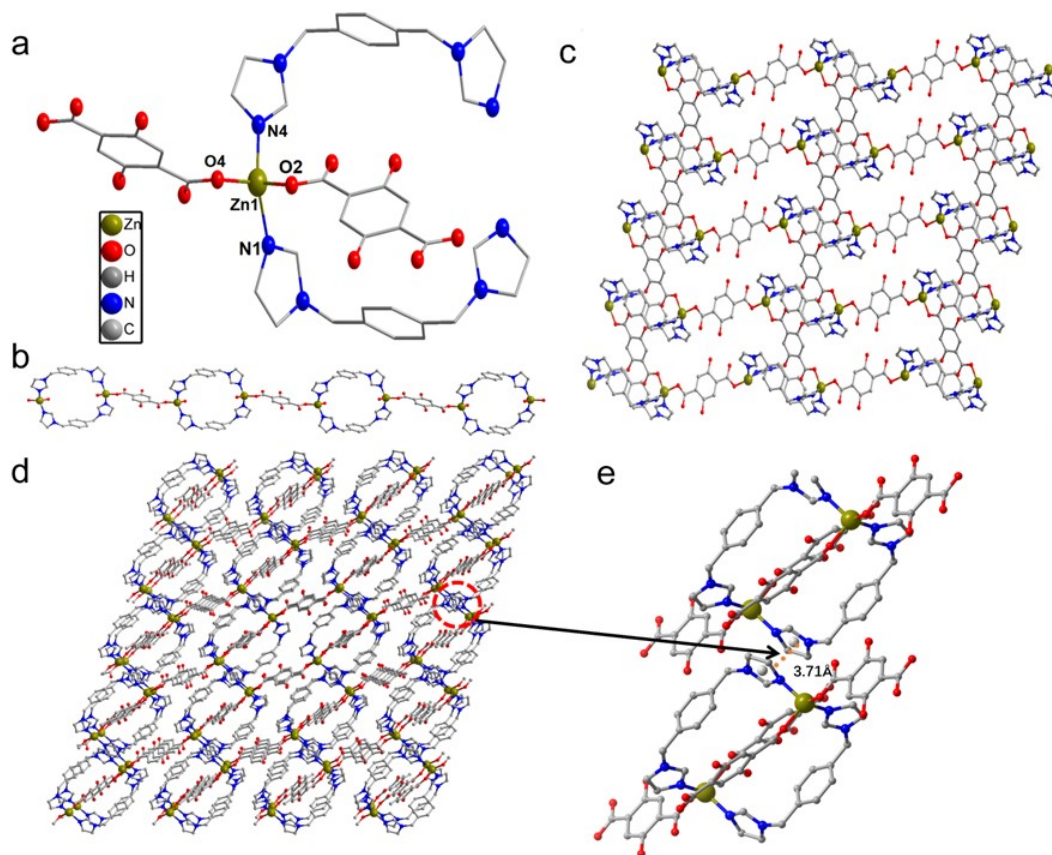

**Figure S1** (a) Coordination environment and geometric configuration of Zn(II) in **1**; (b) The 1D chains of **1**; (c) The 2D layer of **1**; (d) The supramolecular 3D structure of **1**; (e) The  $\pi$ - $\pi$  Packing diagram of **1** (the dashed line represents the interaction). All hydrogen atoms for **1** are omitted for clarity.

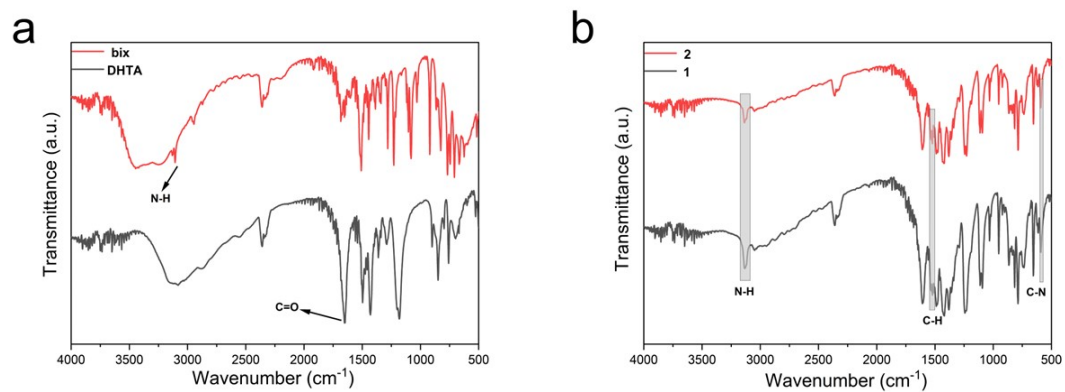

**Figure S2** (a) FTIR for DHTA and bix organic ligands; (b) FTIR for **1** and **2** compounds.

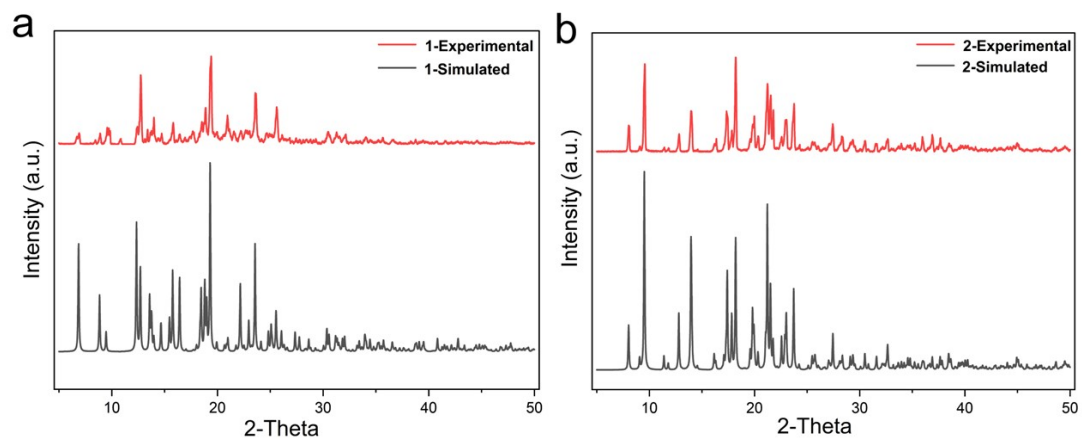

**Figure S3** PXRD curves of **1** (a) and **2** (b).

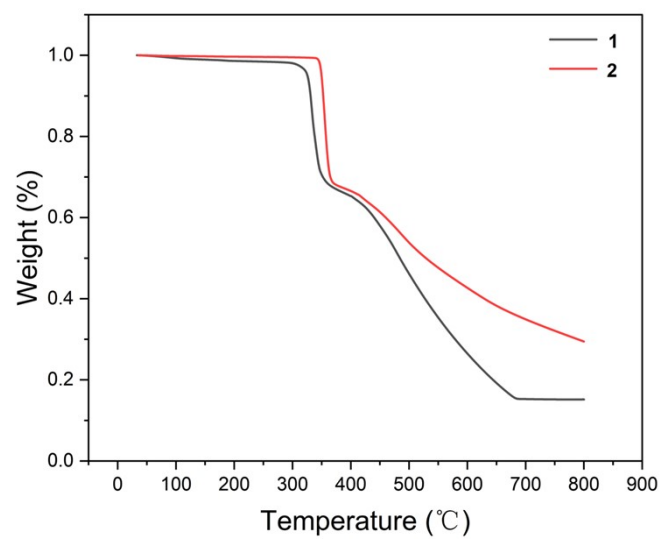

**Figure S4** TGA curves of **1** and **2**.

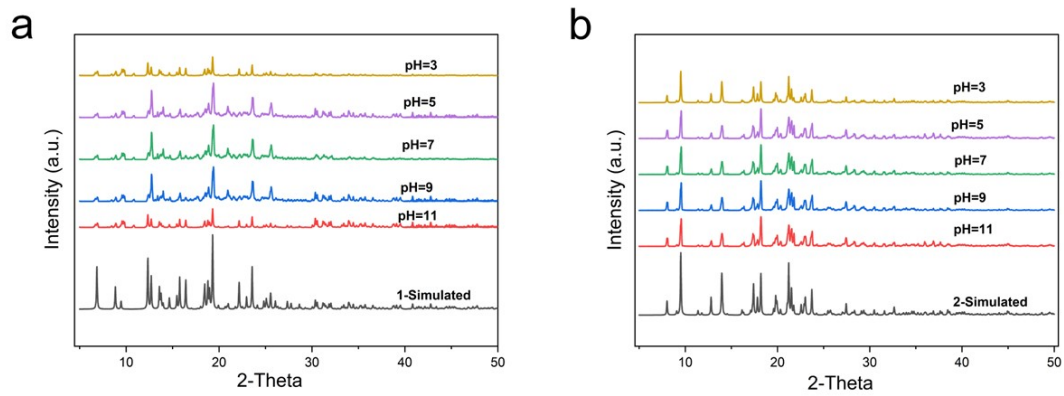

**Figure S5** The pH stability of **1** (a) and **2** (b).

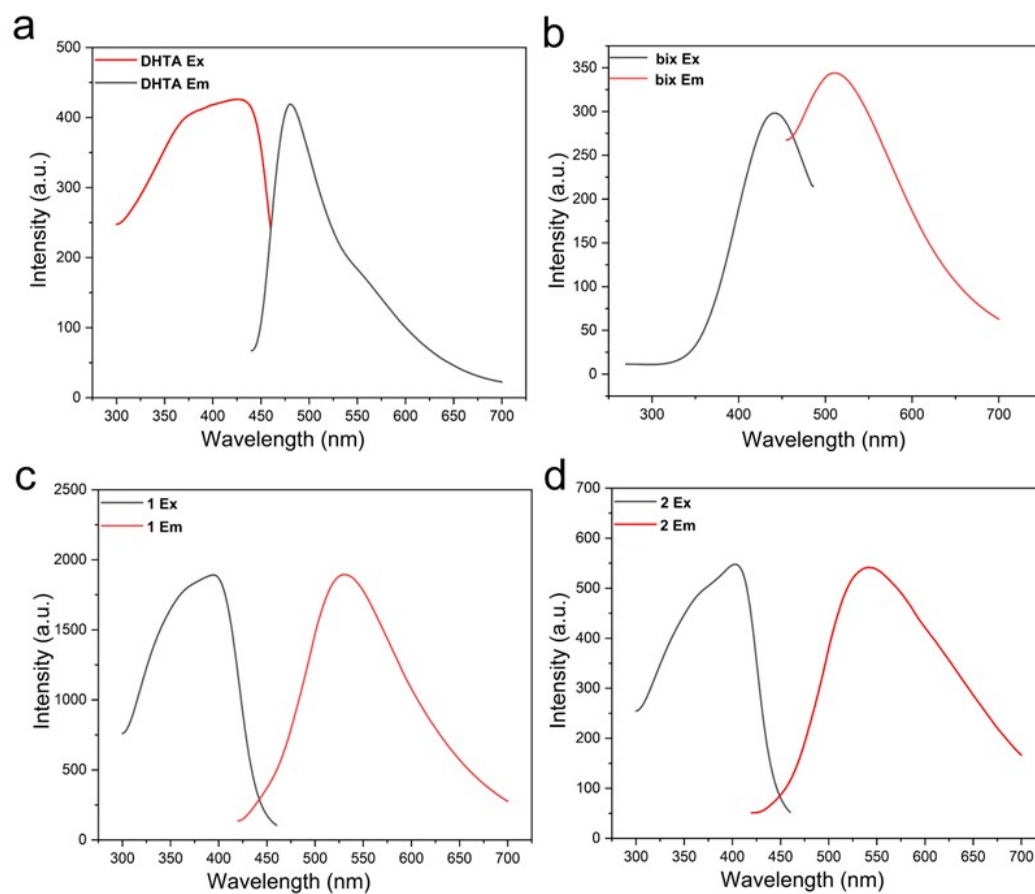

**Figure S6** Solid-state Fluorescence excitation and emission spectra of ligands DHTA (a), bix (b), **1** (c) and **2** (d). (Temperature = 23 °C,  $E_{x\text{DHTA}} = 425$  nm,  $E_{x\text{bix}} = 440$  nm,  $E_{x1} = 394$  nm,  $E_{x2} = 402$  nm.)

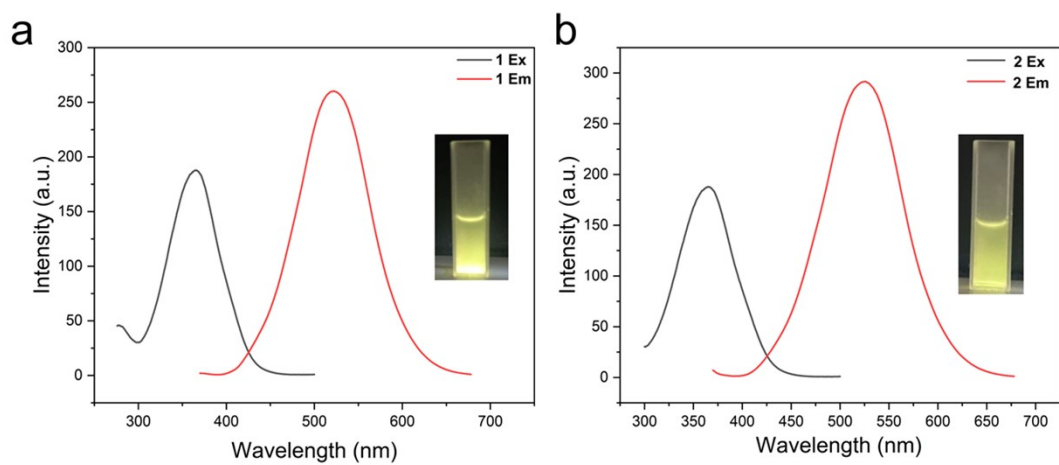

**Figure S7** Liquid fluorescence pattern of **1** (a) and **2** (b). (The solvent is ultrapure water, pH = 7.0, temperature = 23 °C,  $E_{x1}$  = 365 nm,  $E_{x2}$  = 370 nm)

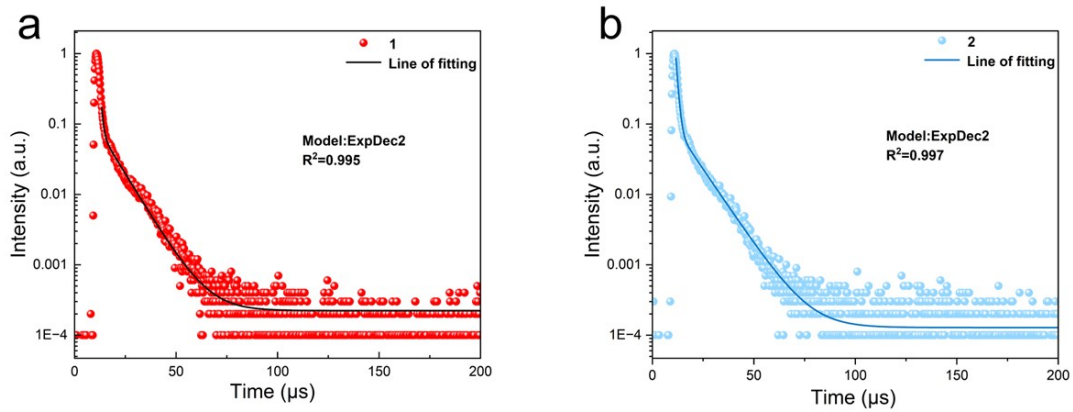

**Figure S8** The luminescence decay curves of **1** (a) and **2** (b).

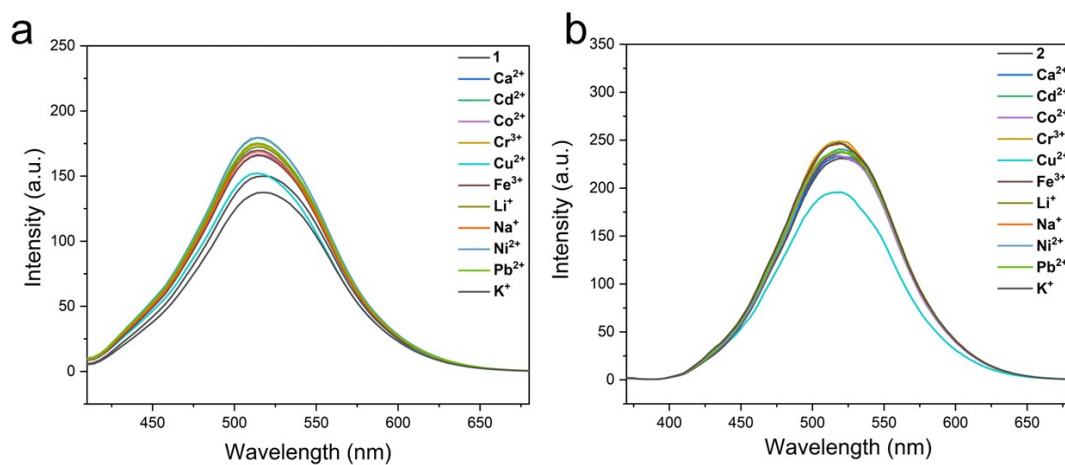

**Figure S9** Fluorescence intensity of **1** (a) and **2** (b) upon addition of different metal cations (20  $\mu$ L) in aqueous solutions. (The solvent is ultrapure water, pH = 7.0, temperature = 23  $^{\circ}$ C,  $E_{x1}$  = 365 nm,  $E_{x2}$  = 370 nm)

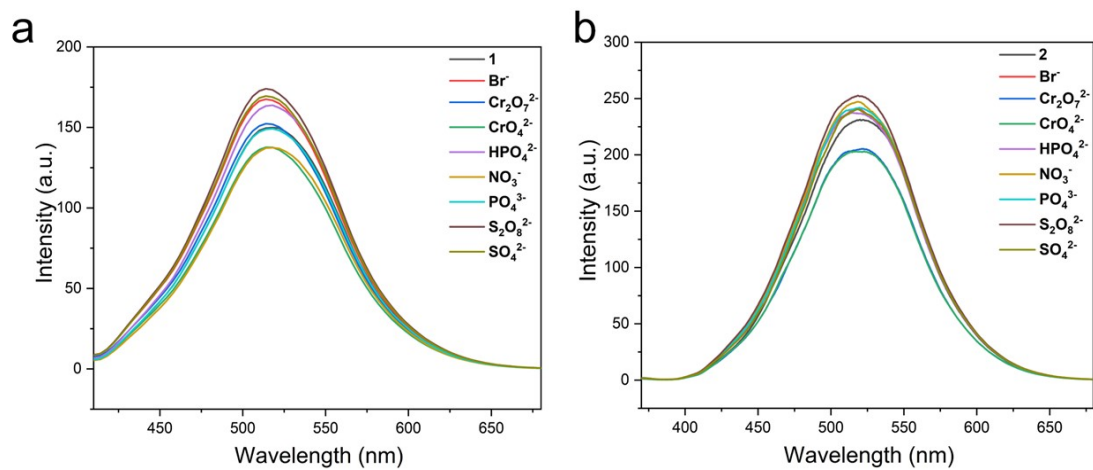

**Figure S10** Fluorescence intensity of **1** (a) and **2** (b) with the addition of different anions (20  $\mu\text{L}$ ) in aqueous solutions. (The solvent is ultrapure water,  $\text{pH} = 7.0$ , temperature =  $23^\circ\text{C}$ ,  $E_{x1} = 365 \text{ nm}$ ,  $E_{x2} = 370 \text{ nm}$ )

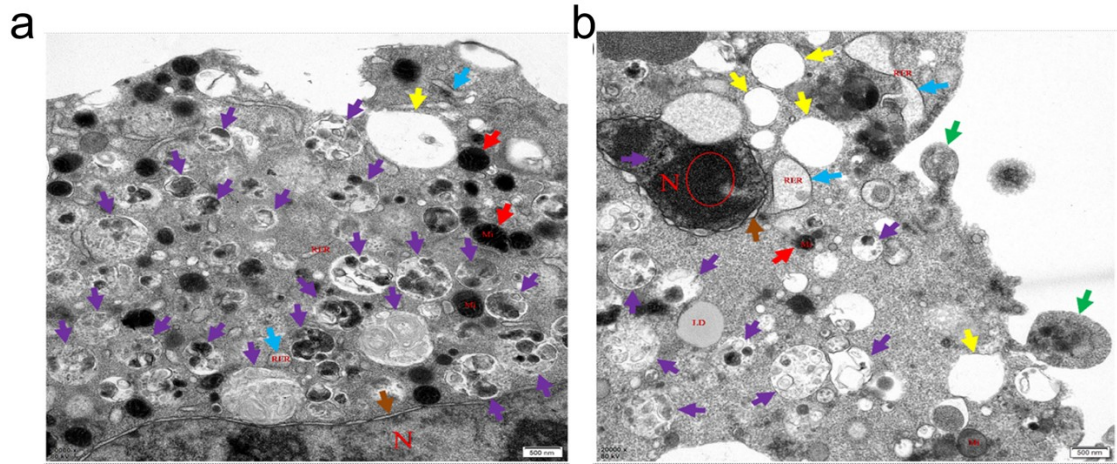

**Figure S11** (a) and (b) belong to the transmission electron microscopy image of compound **1** in HeLa cells. Nucleus (N), mitochondria (Mi), rough endoplasmic reticulum (RER), lipid droplets (LD); nuclear shrinkage and widening of perinuclear space ( $\uparrow$ ), chromatin agglutination ( $\square$ ), mitochondrial shrinkage ( $\uparrow$ ), rough endoplasmic reticulum expansion ( $\uparrow$ ), apoptotic bodies ( $\uparrow$ ), vacuoles ( $\uparrow$ ), autophagy ( $\uparrow$ ).

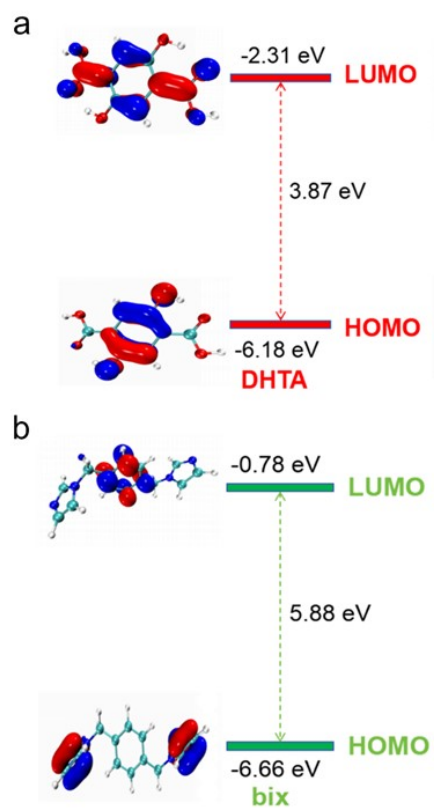

**Figure S12** Energy level diagram of DHTA (a) and bix (b).
